# Supplementary material for: Do Volatiles Affect Bacteria and Plants in the Same Way? Growth and Biochemical Response of Non-Stressed and Cd-Stressed Arabidopsis thaliana and Rhizobium E20-8
Source: MDPI journal article supplement (doi:10.3390/antiox11112303), 2022-11-21
Supplement: s1 [file s1]

**Table S1.** Statistical significance of *Rhizobium* and *Arabidopsis thaliana* growth exposed or not to Cd and to different concentrations of 2,3-Butanediol, 3-Methyl-1-butanol and 2-Butanone.

| organism/compound/Cd | 0nM                        | 1nM                        | 100nM                      | 10uM                       | 1mM                        | 100mM                     |
|----------------------|----------------------------|----------------------------|----------------------------|----------------------------|----------------------------|---------------------------|
| <i>A. thaliana</i>   | mg/ plant                  |                            |                            |                            |                            |                           |
| <i>Rhizobium</i>     | mg/ colony                 |                            |                            |                            |                            |                           |
| At-2,3B              | 3.51±0.62 <sup>a</sup>     | 3.94±0.08 <sup>a</sup>     | 3.90±0.13 <sup>a</sup>     | 3.72±1.17 <sup>a</sup>     | 2.88±0.99 <sup>a</sup>     | 2.46±0.34 <sup>a</sup>    |
| At-2,3B-Cd           | 2.54±1.11 <sup>A</sup>     | 2.37±0.33 <sup>A*</sup>    | 2.85±0.95 <sup>A</sup>     | 2.75±0.52 <sup>A</sup>     | 2.80±0.33 <sup>A</sup>     | 3.01±0.44 <sup>A</sup>    |
| Rz-2,3B              | 89.67±7.91 <sup>a,c</sup>  | 53.07±9.58 <sup>b,c</sup>  | 59.73±10.20 <sup>a</sup>   | 52.61±3.97 <sup>a</sup>    | 67.48±5.83 <sup>a</sup>    | 66.19±4.14 <sup>a</sup>   |
| Rzt-2,3B-Cd          | 58.03±5.92 <sup>A*</sup>   | 35.80±9.38 <sup>A,C</sup>  | 29.07±1.40 <sup>A*</sup>   | 22.90±4.56 <sup>B,C*</sup> | 36.55±5.72 <sup>A,C*</sup> | 38.30±2.84 <sup>D*</sup>  |
| At-3M                | 3.51±0.62 <sup>a</sup>     | 3.87±0.16 <sup>a</sup>     | 4.06±1.03 <sup>a</sup>     | 4.99±1.23 <sup>a</sup>     | 3.71±0.64 <sup>a</sup>     | 3.47±0.36 <sup>a</sup>    |
| At-3M-Cd             | 2.54±1.11 <sup>AC</sup>    | 3.89±1.13 <sup>AC</sup>    | 3.67±0.32 <sup>A</sup>     | 3.72±0.73 <sup>B</sup>     | 2.39±0.34 <sup>C*</sup>    | 2.54±0.71 <sup>A,C</sup>  |
| Rz-3M                | 36.20±2.53 <sup>a,c</sup>  | 38.23±5.20 <sup>a,c</sup>  | 42.56±4.25 <sup>a</sup>    | 51.16±4.60 <sup>a,c*</sup> | 39.50±1.09 <sup>b,c</sup>  | 39.73±0.69 <sup>b,c</sup> |
| Rz-3M-Cd             | 23.07±0.54 <sup>A*</sup>   | 30.33±0.95 <sup>B*</sup>   | 26.77±2.32 <sup>C*</sup>   | 28.37±2.80 <sup>B,C*</sup> | 18.67±0.69 <sup>D*</sup>   | 15.22±3.18 <sup>D*</sup>  |
| At-2B                | 3.51±0.62 <sup>a</sup>     | 4.34±1.35 <sup>a</sup>     | 2.99±0.51 <sup>a</sup>     | 3.37±0.58 <sup>a</sup>     | 3.08±1.02 <sup>a</sup>     | 2.93±0.21 <sup>a</sup>    |
| At-2B-Cd             | 2.54±1.11 <sup>A</sup>     | 3.10±1.08 <sup>A</sup>     | 3.50±0.54 <sup>A</sup>     | 3.01±1.30 <sup>A</sup>     | 2.97±0.45 <sup>A</sup>     | 2.96±0.27 <sup>A</sup>    |
| Rz-2B                | 78.57±15.18 <sup>a,c</sup> | 91.17±16.30 <sup>b,c</sup> | 63.72±7.06 <sup>a</sup>    | 62.38±5.13 <sup>a</sup>    | 59.26±9.43 <sup>a</sup>    | 54.28±17.01 <sup>a</sup>  |
| Rzt-2B-Cd            | 30.07±3.02 <sup>A*</sup>   | 41.17±8.12 <sup>A,C*</sup> | 35.90±7.66 <sup>A,C*</sup> | 36.67±1.74 <sup>B,C*</sup> | 34.78±2.50 <sup>A,C*</sup> | 19.84±4.12 <sup>D*</sup>  |

Values are means of at least 3 replicates ± standard error; different lowercase letters indicate significant differences among compounds concentrations in no Cd (0 µM) condition; uppercase letters indicate significant differences among compounds concentrations in Cd (100 µM) condition, and asterisks indicate significant differences between absence (0 µM) and presence (100 µM) of Cd conditions for the same concentration of the same compound. Significantly different values were considered for p < 0.05.

**Table S2.** Statistical significance of biochemical parameters determined in *Rhizobium* and *Arabidopsis thaliana* exposed or not to Cd and to different concentrations of 2,3-Butanediol, 3-Methyl-1-butanol and 2-Butanone.

| 2,3-Butanediol       |               |                          |                             |                            |                              |                            |
|----------------------|---------------|--------------------------|-----------------------------|----------------------------|------------------------------|----------------------------|
| organism/compound/Cd | concentration | LPO                      | PROT                        | SOD                        | GPx                          | GSTs                       |
| <i>A. thaliana</i>   |               | umol/mg FW               | ug/ mg FW                   | U/mg FW                    | mU/mg FW                     | mU/mg FW                   |
| <i>Rhizobium</i>     |               | nmol/g                   | ug/ mg                      | U/ mg                      | uU/mg                        | uU/mg                      |
| At-2,3B              | 0nM           | 0.11±0.01 <sup>a,c</sup> | 48.04±2.10 <sup>a</sup>     | 0.18±0.00 <sup>a</sup>     | 7.70±1.52 <sup>a,d</sup>     | 3.56±0.77 <sup>a,b,c</sup> |
|                      | 1nM           | 0.10±0.03 <sup>a,c</sup> | 33.81±8.45 <sup>b</sup>     | 0.14±0.00 <sup>b</sup>     | 4.51±0.78 <sup>b</sup>       | 3.86±1.00 <sup>a,b</sup>   |
|                      | 100nM         | 0.10±0.01 <sup>a,c</sup> | 29.00±5.63 <sup>b</sup>     | 0.15±0.01 <sup>b</sup>     | 8.78±1.04 <sup>c</sup>       | 4.04±0.47 <sup>a,b</sup>   |
|                      | 10uM          | 0.10±0.05 <sup>a</sup>   | 34.86±2.56 <sup>b</sup>     | 0.11±0.04 <sup>b,c</sup>   | 8.58±2.35 <sup>a,c</sup>     | 6.78±2.07 <sup>c,b,d</sup> |
|                      | 1mM           | 0.10±0.02 <sup>c</sup>   | 65.39±5.53 <sup>c</sup>     | 0.11±0.02 <sup>c</sup>     | 11.60±4.05 <sup>a,c</sup>    | 7.74±2.37 <sup>b,c,d</sup> |
|                      | 100mM         | 0.15±0.00 <sup>b</sup>   | 46.77±3.48 <sup>a</sup>     | 0.14±0.03 <sup>a,b,c</sup> | 24.52±3.82 <sup>d</sup>      | 7.28±1.46 <sup>c,d</sup>   |
| At-2,3B-Cd           | 0nM           | 0.15±0.04 <sup>A</sup>   | 66.14±8.79 <sup>A*</sup>    | 0.22±0.03 <sup>A</sup>     | 27.86±1.52 <sup>A*</sup>     | 38.91±5.00 <sup>A*</sup>   |
|                      | 1nM           | 0.12±0.04 <sup>A</sup>   | 55.86±14.47 <sup>A</sup>    | 0.20±0.01 <sup>A*</sup>    | 23.42±3.31 <sup>B*</sup>     | 13.22±1.15 <sup>B*</sup>   |
|                      | 100nM         | 0.11±0.01 <sup>A</sup>   | 122.72±9.93 <sup>B*</sup>   | 0.18±0.04 <sup>A</sup>     | 11.02±0.89 <sup>B,C,D*</sup> | 11.79±1.22 <sup>B*</sup>   |
|                      | 10uM          | 0.12±0.08 <sup>A</sup>   | 112.45±19.06 <sup>B*</sup>  | 0.23±0.07 <sup>A*</sup>    | 12.64±0.54 <sup>C,D*</sup>   | 9.18±1.72 <sup>B</sup>     |
|                      | 1mM           | 0.14±0.03 <sup>A</sup>   | 90.82±3.32 <sup>B*</sup>    | 0.24±0.04 <sup>A*</sup>    | 13.18±7.52 <sup>D</sup>      | 8.15±1.42 <sup>C</sup>     |
|                      | 100mM         | 0.17±0.06 <sup>A</sup>   | 48.28±9.09 <sup>B</sup>     | 0.06±0.01 <sup>A*</sup>    | 12.65±0.86 <sup>C,D*</sup>   | 7.57±1.47 <sup>C</sup>     |
| Rz-2,3B              | 0nM           | 1.99±0.10 <sup>a</sup>   | 211.34±83.23 <sup>a</sup>   | 0.29±0.04 <sup>a,c</sup>   | 9.04±1.03 <sup>a</sup>       | 5.20±0.88 <sup>a</sup>     |
|                      | 1nM           | 4.41±0.66 <sup>b</sup>   | 188.84±7.48 <sup>a</sup>    | 0.38±0.03 <sup>b,c</sup>   | 7.61±0.52 <sup>a,b</sup>     | 6.43±1.00 <sup>a,b</sup>   |
|                      | 100nM         | 2.25±0.22 <sup>a</sup>   | 219.92±32.13 <sup>a</sup>   | 0.29±0.04 <sup>a,c</sup>   | 7.64±1.48 <sup>a,b</sup>     | 5.07±1.08 <sup>a</sup>     |
|                      | 10uM          | 1.71±0.08 <sup>c</sup>   | 586.90±82.16 <sup>b</sup>   | 0.28±0.01 <sup>a</sup>     | 6.50±1.31 <sup>b</sup>       | 5.09±1.05 <sup>a</sup>     |
|                      | 1mM           | 2.28±0.39 <sup>a,c</sup> | 203.85±19.56 <sup>a</sup>   | 0.33±0.04 <sup>c</sup>     | 6.32±1.31 <sup>b</sup>       | 6.76±1.09 <sup>a</sup>     |
|                      | 100mM         | 1.20±0.07 <sup>d</sup>   | 197.15±60.41 <sup>a</sup>   | 0.32±0.03 <sup>a,c</sup>   | 5.80±1.72 <sup>b</sup>       | 7.31±0.93 <sup>b</sup>     |
| Rz-2,3B-Cd           | 0nM           | 2.77±0.26 <sup>A*</sup>  | 359.86±99.59 <sup>A,C</sup> | 0.69±0.06 <sup>A*</sup>    | 13.29±0.18 <sup>A*</sup>     | 5.80±0.14 <sup>A</sup>     |
|                      | 1nM           | 3.56±0.32 <sup>B</sup>   | 356.91±71.04 <sup>A,C</sup> | 0.87±0.08 <sup>B*</sup>    | 12.86±0.53 <sup>B*</sup>     | 9.48±0.66 <sup>B*</sup>    |
|                      | 100nM         | 3.25±0.28 <sup>B*</sup>  | 327.21±69.60 <sup>B</sup>   | 0.81±0.14 <sup>A,B*</sup>  | 8.54±2.38 <sup>C</sup>       | 8.60±2.65 <sup>A</sup>     |

|       |                         |                           |                           |                            |                          |
|-------|-------------------------|---------------------------|---------------------------|----------------------------|--------------------------|
| 10uM  | 2.23±0.38 <sup>D</sup>  | 270.69±28.87 <sup>A</sup> | 0.64±0.17 <sup>A,B*</sup> | 9.68±1.89 <sup>D</sup>     | 9.25±0.84 <sup>B*</sup>  |
| 1mM   | 1.23±0.15 <sup>C*</sup> | 457.86±97.74 <sup>C</sup> | 0.71±0.15 <sup>A,B*</sup> | 7.84±1.28 <sup>C,D</sup>   | 12.97±0.96 <sup>C*</sup> |
| 100mM | 1.97±0.22 <sup>D*</sup> | 828.34±53.62 <sup>A</sup> | 0.65±0.09 <sup>A*</sup>   | 19.60±4.07 <sup>C,D*</sup> | 25.20±3.86 <sup>D*</sup> |

## 2-Butanone

| organism/compound/Cd concentration |       | LPO                       | PROT                         | SOD                       | GPx                        | GSTs                        |
|------------------------------------|-------|---------------------------|------------------------------|---------------------------|----------------------------|-----------------------------|
| <i>A. thaliana</i>                 |       | umol/mg FW                | ug/ mg FW                    | U/mg FW                   | mU/mg FW                   | mU/mg FW                    |
| <i>Rhizobium</i>                   |       | nmol/g                    | ug/ mg                       | U/ mg                     | uU/mg                      | uU/mg                       |
| At-2B                              | 0nM   | 0.11±0.01 <sup>a</sup>    | 48.04±2.10 <sup>a</sup>      | 0.18±0.00 <sup>a</sup>    | 7.70±1.52 <sup>a</sup>     | 3.56±0.77 <sup>a</sup>      |
|                                    | 1nM   | 0.11±0.05 <sup>a</sup>    | 57.00±2.46 <sup>a</sup>      | 0.08±0.03 <sup>b</sup>    | 16.94±5.33 <sup>b</sup>    | 6.69±2.29 <sup>a</sup>      |
|                                    | 100nM | 0.13±0.02 <sup>a</sup>    | 60.32±5.19 <sup>a</sup>      | 0.14±0.00 <sup>c</sup>    | 16.88±3.87 <sup>b</sup>    | 4.53±0.26 <sup>a</sup>      |
|                                    | 10uM  | 0.13±0.03 <sup>a</sup>    | 85.18±11.60 <sup>a</sup>     | 0.12±0.02 <sup>b,c</sup>  | 13.25±0.31 <sup>b</sup>    | 3.61±1.25 <sup>a</sup>      |
|                                    | 1mM   | 0.15±0.05 <sup>a</sup>    | 79.28±4.11 <sup>a</sup>      | 0.11±0.02 <sup>b,c</sup>  | 22.31±6.17 <sup>b</sup>    | 4.51±0.71 <sup>a</sup>      |
|                                    | 100mM | 0.15±0.04 <sup>a</sup>    | 49.01±4.81 <sup>a</sup>      | 0.22±0.06 <sup>a</sup>    | 16.39±3.59 <sup>b</sup>    | 7.01±0.16 <sup>b</sup>      |
| At-2B-Cd                           | 0nM   | 0.16±0.04 <sup>A</sup>    | 66.14±8.79 <sup>A*</sup>     | 0.22±0.03 <sup>A</sup>    | 27.86±1.52 <sup>A*</sup>   | 38.91±5.00 <sup>A*</sup>    |
|                                    | 1nM   | 0.17±0.04 <sup>A</sup>    | 66.50±16.74 <sup>A</sup>     | 0.20±0.06 <sup>A,B*</sup> | 13.97±2.27 <sup>A</sup>    | 14.00±2.60 <sup>B*</sup>    |
|                                    | 100nM | 0.14±0.01 <sup>A</sup>    | 36.83±5.22 <sup>A*</sup>     | 0.12±0.04 <sup>B</sup>    | 14.10±5.19 <sup>A</sup>    | 16.04±9.84 <sup>B,C</sup>   |
|                                    | 10uM  | 0.22±0.09 <sup>A</sup>    | 36.68±4.33 <sup>A*</sup>     | 0.20±0.09 <sup>B</sup>    | 14.95±4.60 <sup>A</sup>    | 9.84±1.67 <sup>B*</sup>     |
|                                    | 1mM   | 0.22±0.04 <sup>A</sup>    | 40.25±10.95 <sup>A</sup>     | 0.21±0.08 <sup>A,B*</sup> | 12.23±1.92 <sup>A*</sup>   | 6.90±0.92 <sup>C*</sup>     |
|                                    | 100mM | 0.22±0.08 <sup>A</sup>    | 120.50±46.81 <sup>A*</sup>   | 0.29±0.09 <sup>A,B</sup>  | 9.00±1.41 <sup>B*</sup>    | 27.02±11.95 <sup>A,B*</sup> |
| Rz-2B                              | 0nM   | 2.04±0.22 <sup>a</sup>    | 211.34±42.79 <sup>a</sup>    | 0.29±0.06 <sup>a</sup>    | 9.04±1.03 <sup>a</sup>     | 5.20±0.91 <sup>a,b</sup>    |
|                                    | 1nM   | 1.99±0.24 <sup>a</sup>    | 181.94±25.55 <sup>a</sup>    | 0.21±0.03 <sup>a</sup>    | 7.61±0.52 <sup>a,b</sup>   | 4.84±0.51 <sup>a</sup>      |
|                                    | 100nM | 2.03±0.39 <sup>a</sup>    | 260.57±36.72 <sup>b</sup>    | 0.36±0.05 <sup>a</sup>    | 7.64±1.48 <sup>a,b</sup>   | 5.38±0.63 <sup>a,b</sup>    |
|                                    | 10uM  | 1.92±0.39 <sup>a</sup>    | 244.25±58.73 <sup>b</sup>    | 0.50±0.06 <sup>b</sup>    | 6.50±1.31 <sup>b</sup>     | 5.67±0.06 <sup>b</sup>      |
|                                    | 1mM   | 1.87±0.14 <sup>a</sup>    | 366.57±64.62 <sup>b</sup>    | 0.52±0.06 <sup>b</sup>    | 6.19±1.32 <sup>b</sup>     | 7.57±1.53 <sup>b</sup>      |
|                                    | 100mM | 2.91±0.35 <sup>b</sup>    | 350.18±117.23 <sup>a</sup>   | 0.63±0.08 <sup>b</sup>    | 5.80±1.72 <sup>b</sup>     | 7.49±1.66 <sup>b</sup>      |
| Rz-2B-Cd                           | 0nM   | 3.02±0.40 <sup>A*</sup>   | 359.86±36.54 <sup>A*</sup>   | 0.69±0.06 <sup>A*</sup>   | 13.29±0.18 <sup>A*</sup>   | 5.8±0.49 <sup>A</sup>       |
|                                    | 1nM   | 2.10±0.26 <sup>B</sup>    | 280.36±50.91 <sup>A,B*</sup> | 0.56±0.11 <sup>A*</sup>   | 12.86±0.53 <sup>A,B*</sup> | 3.38±0.08 <sup>B*</sup>     |
|                                    | 100nM | 2.91±0.60 <sup>A,B</sup>  | 252.20±14.32 <sup>B</sup>    | 0.63±0.12 <sup>A*</sup>   | 9.32±1.43 <sup>B</sup>     | 5.08±0.77 <sup>A,B</sup>    |
|                                    | 10uM  | 2.54±0.56 <sup>A,B</sup>  | 250.99±51.07 <sup>B,C</sup>  | 0.65±0.02 <sup>A*</sup>   | 9.68±1.89 <sup>B</sup>     | 5.00±0.82 <sup>A,B</sup>    |
|                                    | 1mM   | 3.58±0.95 <sup>A,B*</sup> | 198.51±24.03 <sup>C</sup>    | 0.53±0.13 <sup>A</sup>    | 7.84±1.28 <sup>B</sup>     | 6.95±0.55 <sup>C</sup>      |
|                                    | 100mM | 11.56±1.09 <sup>C*</sup>  | 298.00±48.96 <sup>A,B</sup>  | 1.33±0.07 <sup>B*</sup>   | 22.93±3.47 <sup>C*</sup>   | 6.12±0.83 <sup>A,C</sup>    |

## 2-Butanone

| organism/compound/Cd concentration |       | LPO                    | PROT                       | SOD                       | GPx                      | GSTs                        |
|------------------------------------|-------|------------------------|----------------------------|---------------------------|--------------------------|-----------------------------|
| <i>A. thaliana</i>                 |       | umol/mg FW             | ug/ mg FW                  | U/mg FW                   | mU/mg FW                 | mU/mg FW                    |
| <i>Rhizobium</i>                   |       | nmol/g                 | ug/ mg                     | U/ mg                     | uU/mg                    | uU/mg                       |
| At-2B                              | 0nM   | 0.11±0.01 <sup>a</sup> | 48.04±2.10 <sup>a</sup>    | 0.18±0.00 <sup>a</sup>    | 7.70±1.52 <sup>a</sup>   | 3.56±0.77 <sup>a</sup>      |
|                                    | 1nM   | 0.11±0.05 <sup>a</sup> | 57.00±2.46 <sup>b</sup>    | 0.08±0.03 <sup>b</sup>    | 16.94±5.33 <sup>b</sup>  | 6.69±2.29 <sup>a</sup>      |
|                                    | 100nM | 0.13±0.02 <sup>a</sup> | 60.32±5.19 <sup>b</sup>    | 0.14±0.00 <sup>c</sup>    | 16.88±3.87 <sup>b</sup>  | 4.53±0.26 <sup>a</sup>      |
|                                    | 10uM  | 0.13±0.03 <sup>a</sup> | 85.18±11.60 <sup>c</sup>   | 0.12±0.02 <sup>b,c</sup>  | 13.25±0.31 <sup>b</sup>  | 3.61±1.25 <sup>a</sup>      |
|                                    | 1mM   | 0.15±0.05 <sup>a</sup> | 79.28±4.11 <sup>b</sup>    | 0.11±0.02 <sup>b,c</sup>  | 22.31±6.17 <sup>b</sup>  | 4.51±0.71 <sup>a</sup>      |
|                                    | 100mM | 0.15±0.04 <sup>a</sup> | 49.01±4.81 <sup>a</sup>    | 0.22±0.06 <sup>a</sup>    | 16.39±3.59 <sup>b</sup>  | 7.01±0.16 <sup>b</sup>      |
| At-2B-Cd                           | 0nM   | 0.16±0.04 <sup>A</sup> | 66.14±8.79 <sup>A*</sup>   | 0.22±0.03 <sup>A</sup>    | 27.86±1.52 <sup>A*</sup> | 38.91±5.00 <sup>A*</sup>    |
|                                    | 1nM   | 0.17±0.04 <sup>A</sup> | 66.50±16.74 <sup>A</sup>   | 0.20±0.06 <sup>A,B*</sup> | 13.97±2.27 <sup>A</sup>  | 14.00±2.60 <sup>B*</sup>    |
|                                    | 100nM | 0.14±0.01 <sup>A</sup> | 36.83±5.22 <sup>B*</sup>   | 0.12±0.04 <sup>B</sup>    | 14.10±5.19 <sup>B</sup>  | 16.04±9.84 <sup>B,C</sup>   |
|                                    | 10uM  | 0.22±0.09 <sup>A</sup> | 36.68±4.33 <sup>A*</sup>   | 0.20±0.09 <sup>B</sup>    | 14.95±4.60 <sup>B</sup>  | 9.84±1.67 <sup>B*</sup>     |
|                                    | 1mM   | 0.22±0.04 <sup>A</sup> | 40.25±10.95 <sup>B</sup>   | 0.21±0.08 <sup>A,B*</sup> | 12.23±1.92 <sup>B*</sup> | 6.90±0.92 <sup>C*</sup>     |
|                                    | 100mM | 0.22±0.08 <sup>A</sup> | 120.50±46.81 <sup>B*</sup> | 0.29±0.09 <sup>A,B</sup>  | 9.00±1.41 <sup>C*</sup>  | 27.02±11.95 <sup>A,B*</sup> |
| Rz-2B                              | 0nM   | 2.04±0.22 <sup>a</sup> | 211.34±42.79 <sup>a</sup>  | 0.29±0.06 <sup>a</sup>    | 9.04±1.03 <sup>a</sup>   | 5.20±0.91 <sup>a,b</sup>    |
|                                    | 1nM   | 1.99±0.24 <sup>a</sup> | 181.94±25.55 <sup>a</sup>  | 0.21±0.03 <sup>a</sup>    | 7.61±0.52 <sup>a,b</sup> | 4.84±0.51 <sup>a</sup>      |
|                                    | 100nM | 2.03±0.39 <sup>a</sup> | 260.57±36.72 <sup>b</sup>  | 0.36±0.05 <sup>a</sup>    | 7.64±1.48 <sup>a,b</sup> | 5.38±0.63 <sup>a,b</sup>    |

|                 |       |                           |                              |                         |                            |                          |
|-----------------|-------|---------------------------|------------------------------|-------------------------|----------------------------|--------------------------|
| <b>Rz-2B-Cd</b> | 10uM  | 1.92±0.39 <sup>a</sup>    | 244.25±58.73 <sup>b</sup>    | 0.50±0.06 <sup>b</sup>  | 6.50±1.31 <sup>b</sup>     | 5.67±0.06 <sup>b</sup>   |
|                 | 1mM   | 1.87±0.14 <sup>a</sup>    | 366.57±64.62 <sup>b</sup>    | 0.52±0.06 <sup>b</sup>  | 6.19±1.32 <sup>b</sup>     | 7.57±1.53 <sup>b</sup>   |
|                 | 100mM | 2.91±0.35 <sup>b</sup>    | 350.18±117.23 <sup>a</sup>   | 0.63±0.08 <sup>b</sup>  | 5.80±1.72 <sup>b</sup>     | 7.49±1.66 <sup>b</sup>   |
|                 | 0nM   | 3.02±0.40 <sup>A*</sup>   | 359.86±36.54 <sup>A*</sup>   | 0.69±0.06 <sup>A*</sup> | 13.29±0.18 <sup>A*</sup>   | 5.8±0.49 <sup>A</sup>    |
|                 | 1nM   | 2.10±0.26 <sup>B</sup>    | 280.36±50.91 <sup>A,B*</sup> | 0.56±0.11 <sup>A*</sup> | 12.86±0.53 <sup>A,B*</sup> | 3.38±0.08 <sup>B*</sup>  |
|                 | 100nM | 2.91±0.60 <sup>A,B</sup>  | 252.20±14.32 <sup>B</sup>    | 0.63±0.12 <sup>A*</sup> | 9.32±1.43 <sup>B</sup>     | 5.08±0.77 <sup>A,B</sup> |
|                 | 10uM  | 2.54±0.56 <sup>A,B</sup>  | 250.99±51.07 <sup>B,C</sup>  | 0.65±0.02 <sup>A*</sup> | 9.68±1.89 <sup>B</sup>     | 5.00±0.82 <sup>A,B</sup> |
|                 | 1mM   | 3.58±0.95 <sup>A,B*</sup> | 198.51±24.03 <sup>C</sup>    | 0.53±0.13 <sup>A</sup>  | 7.84±1.28 <sup>B</sup>     | 6.95±0.55 <sup>C</sup>   |
|                 | 100mM | 11.56±1.09 <sup>C*</sup>  | 298.00±48.96 <sup>A,B</sup>  | 1.33±0.07 <sup>B*</sup> | 22.93±3.47 <sup>C*</sup>   | 6.12±0.83 <sup>A,C</sup> |

Values are means of at least 3 replicates ± standard error; different lowercase letters indicate significant differences among compounds concentrations in no Cd (0 μM) condition; uppercase letters indicate significant differences among compounds concentrations in Cd condition, and asterisks indicate significant differences between conditions (0 and 100 μM Cd) for the same concentration of the same compound. Considered significantly different values of  $p < 0.05$ .
